# Supplementary material for: Managing Inventory and Supply Performance in Assembly Systems with Random Supply Capacity and Demand
Source: Atypon-hosted journal article supplement (doi:10.1287/mnsc.1040.0314), 2004-12-01
Supplement: mnsc.1040.0314-sm-bollapragada_rao_zhang_companion.pdf [file mnsc.1040.0314-sm-bollapragada_rao_zhang_companion.pdf]

# Managing Inventory and Supply Performance in Assembly Systems with Random Supply Capacity and Demand

## Online Supplement / Electronic Companion Pages

Ramesh Bollapragada‡ Uday S. Rao† Jun Zhang\*

‡College of Business, San Francisco State University CA 94132 and  
Bell Laboratories, Lucent Technologies, Holmdel NJ 07733

†College of Business, University of Cincinnati, Cincinnati OH 45221

\*A.B. Freeman School of Business, Tulane University, New Orleans LA 70118

Sept. 2004

## Proofs of Results

**Proof of Proposition 1** Follows from Theorem 5.1 of Glasserman and Yao (1995) because the shortfall recursion belongs to their case (A1). To see this, observe that the shortfall vector may be written as  $Y_{n+1} = A(n) \otimes Y_n \oplus B(n)$ , where  $\otimes$  corresponds to  $+$ ,  $\oplus$  corresponds to  $\max$ , and  $A(n)$  and  $B(n)$  satisfy,

$$A(n) = \begin{vmatrix} -\infty & \xi_n - s^1 & \xi_n - s^2 \\ -\infty & \xi_n - \eta_n^1 & -\infty \\ -\infty & -\infty & \xi_n - \eta_n^2 \end{vmatrix}, \quad B(n) = \begin{vmatrix} 0 \\ 0 \\ 0 \end{vmatrix}.$$

To complete the proof, we need to verify the following conditions: (1)  $E[(\|A(0)\|_v)^+] < \infty$ , (2)  $\gamma_{v+} < 0$ , and (3)  $E[(\|B(0)\|_v)^+] < \infty$ , where  $\|\cdot\|_v$  and  $\gamma_{v+}$  are defined as in Glasserman and Yao (1995). Because it is easy to see that both  $E[(\|A(0)\|_v)^+] < \infty$  and  $E[(\|B(0)\|_v)^+] < \infty$  hold, we only show that  $\gamma_{v+} < 0$ .

By Lemma 5A of Glasserman and Yao (1995),  $\lim_{n \rightarrow \infty} n^{-1} \|P(m, n)\|_v = \gamma_{v+}$  with probability one, where  $P(m, n) = A(n) \otimes \cdots \otimes A(m)$ ,  $m < n$ . In our case

$$P(m, n) = \begin{vmatrix} -\infty & \xi_n - s^1 + \sum_{k=m}^{n-1} (\xi_k - \eta_k^1) & \xi_n - s^2 + \sum_{k=m}^{n-1} (\xi_k - \eta_k^2) \\ -\infty & \sum_{k=m}^n (\xi_k - \eta_k^1) & -\infty \\ -\infty & -\infty & \sum_{k=m}^n (\xi_k - \eta_k^2) \end{vmatrix},$$

so that

$$\|P(m, n)\|_v = \max \begin{cases} \xi_n - s^i + \sum_{k=m}^{n-1} (\xi_k - \eta_k^i), i = 1, 2, \\ \sum_{k=m}^n (\xi_k - \eta_k^i), i = 1, 2. \end{cases} \quad (8)$$

From the ergodicity condition and the law of large numbers, we know that, with probability one,

$$\lim_{n \rightarrow \infty} \frac{1}{n} (\xi_n - s^i + \sum_{k=m}^{n-1} (\xi_k - \eta_k^i)) = E[\xi] - E[\eta^i] - s^i, \quad \text{and,}$$

$$\lim_{n \rightarrow \infty} \frac{1}{n} \sum_{k=m}^n (\xi_k - \eta_k^i) = E[\xi] - E[\eta^i], \quad \text{for } i = 1, 2.$$

Consider the intersection of the probability spaces on which the above limits hold. Then, on this space, whose probability is one, for any  $\epsilon > 0$ , when  $n$  is big enough, we have:

$$\frac{1}{n}(\xi_n - s^i + \sum_{k=m}^{n-1} (\xi_k - \eta_k^i)) \leq E[\xi] - E[\eta^i] - s^i + \epsilon, \quad \text{and,}$$

$$\frac{1}{n} \sum_{k=m}^n (\xi_k - \eta_k^i) \leq E[\xi] - E[\eta^i] + \epsilon, \quad \text{for } i = 1, 2.$$

From (8), we conclude that, with probability one,  $n^{-1}\|P(m, n)\|_v \leq \max\{E[\xi] - E[\eta^1] - s^1, E[\xi] - E[\eta^2] - s^2, E[\xi] - E[\eta^1], E[\xi] - E[\eta^2]\} + \epsilon$ , when  $n$  is big enough. Hence, because  $s^1, s^2 \geq 0$ ,  $\gamma_{v+} = \lim_{n \rightarrow \infty} n^{-1}\|P(m, n)\|_v \leq \max\{E[\xi] - E[\eta^1], E[\xi] - E[\eta^2]\} < 0$ , where the last inequality is based on the condition that  $E[\xi] < E[\eta^i]$  for  $i = 1, 2$ . Therefore, condition (2), stated earlier in the proof, is satisfied, which completes the proof.  $\blacksquare$

**Proof of Proposition 2.** Note that  $Y^0 = \max_i\{0, Y^i + \xi - s^i\}$  is a convex function because each argument of the max operation is a linear function, and the maxima of convex functions is convex. Hence,  $s^0 - Y^0$  is a concave function. By Proposition 3.1 of Wets 1989, the feasible region  $A(s^0, s^1, s^2)$  is a closed convex set.  $\blacksquare$

**Proof of Proposition 3.** We only prove result (i), because (ii) follows using similar arguments. Because the monotonicity in (i) is trivial, we only need to show that  $s^0(s^1, s^2)$  is convex in  $(s^1, s^2)$ . Let  $s^1 = \theta s_x^1 + (1-\theta)s_y^1$  and  $s^2 = \theta s_x^2 + (1-\theta)s_y^2$ . If  $s_x^0 = s^0(s_x^1, s_x^2)$  and  $s_y^0 = s^0(s_y^1, s_y^2)$ , then  $\vec{s}_x \equiv (s_x^0, s_x^1, s_x^2) \in A$  and  $\vec{s}_y \equiv (s_y^0, s_y^1, s_y^2) \in A$ , where  $A$  is the feasible region for the two-echelon assembly system problem. Because  $A$  is a convex set, we know that for any  $0 \leq \theta \leq 1$ ,  $\theta \vec{s}_x + (1-\theta)\vec{s}_y \in A$ , so  $\theta s_x^0 + (1-\theta)s_y^0$  is a feasible  $s^0$  value corresponding to  $s^1$  and  $s^2$ . By definition,  $s^0(\theta s_x^1 + (1-\theta)s_y^1, \theta s_x^2 + (1-\theta)s_y^2)$  is the minimal feasible value of  $s^0$  corresponding to  $s^1$  and  $s^2$ . Consequently,

$$s^0(\theta s_x^1 + (1-\theta)s_y^1, \theta s_x^2 + (1-\theta)s_y^2) \leq \theta s_x^0 + (1-\theta)s_y^0.$$

That is,  $s^0(\theta s_x^1 + (1-\theta)s_y^1, \theta s_x^2 + (1-\theta)s_y^2) \leq \theta s^0(s_x^1, s_x^2) + (1-\theta)s^0(s_y^1, s_y^2)$ , proving that  $s^0(s^1, s^2)$  is convex in  $(s^1, s^2)$ .  $\blacksquare$

**Proof of Proposition 5.** By contradiction. Suppose  $s^{1*} > s^{2*}$  instead, then there exists  $\epsilon > 0$  such that  $s^{1*} - \epsilon \geq s^{2*}$ .

Because  $\eta^1 \geq_{st} \eta^2$ , by Proposition 1,  $Y^1 \leq_{st} Y^2$  (Stoyan 1983). Therefore, there exist  $\hat{Y}^1$  and  $\hat{Y}^2$  defined on the same probability space such that  $\hat{Y}^1 \stackrel{st}{=} Y^1$ ,  $\hat{Y}^2 \stackrel{st}{=} Y^2$  and  $\hat{Y}^1 \leq \hat{Y}^2$  a.s. (Stoyan 1983). Combining the above three statements, we have

$$\xi - s^{1*} + \hat{Y}^1 \leq \xi - (s^{1*} - \epsilon) + \hat{Y}^1 \leq \xi - s^{2*} + \hat{Y}^2 \text{ a. s.} \quad (9)$$

It follows that,

$$\begin{aligned} & P[s^{0*} - \max\{0, Y^1 + \xi - (s^{1*} - \epsilon), Y^2 + \xi - s^{2*}\} \geq \xi] \\ \stackrel{\hat{Y}^i \stackrel{st}{=} Y^i}{\implies} & P[s^{0*} - \max\{0, \hat{Y}^1 + \xi - (s^{1*} - \epsilon), \hat{Y}^2 + \xi - s^{2*}\} \geq \xi] \\ \stackrel{(9)}{\implies} & P[s^{0*} - \max\{0, \hat{Y}^1 + \xi - s^{1*}, \hat{Y}^2 + \xi - s^{2*}\} \geq \xi] \\ \stackrel{\hat{Y}^i \stackrel{st}{=} Y^i}{\implies} & P[s^{0*} - \max\{0, Y^1 + \xi - s^{1*}, Y^2 + \xi - s^{2*}\} \geq \xi] \geq \alpha. \end{aligned}$$

Thus we find a feasible solution  $(s^{0*}, s^{1*} - \epsilon, s^{2*})$  for the problem with a lower objective function value than the optimal, which yields a contradiction.  $\blacksquare$

**Proof of Proposition 9.** By contradiction. We only show that  $s^{1*}$  decreases with  $c^1$ . The other claims can be proved similarly.

Let the optimal base-stock level at cost  $(c^1, c^2, c^0)$  be  $(s^{1*}, s^{2*}, s^{3*})$ . Suppose  $s^{1*}$  strictly increases in  $c^1$ . Then, when  $c^1$  increases to  $c^1 + \epsilon$  with  $\epsilon > 0$ , the optimal base-stock level can be written as  $(s^{1*} + \delta^1, s^{2*} + \delta^2, s^{0*} + \delta^0)$ , where  $\delta^1 > 0$ . It follows that

$$c^0(s^{0*} + \delta^0) + (c^1 + \epsilon)(s^{1*} + \delta^1) + c^2(s^{2*} + \delta^2) < c^0 s^{0*} + (c^1 + \epsilon)s^{1*} + c^2 s^{2*},$$

which implies

$$c^0 \delta^0 + (c^1 + \epsilon)\delta^1 + c^2 \delta^2 < 0. \quad (10)$$

Because  $(s^{1*}, s^{2*}, s^{3*})$  is the optimal base-stock level for  $(c^1, c^2, c^0)$ , we have

$$c^0 s^{0*} + c^1 s^{1*} + c^2 s^{2*} \leq c^0(s^{0*} + \delta^0) + c^1(s^{1*} + \delta^1) + c^2(s^{2*} + \delta^2),$$

which implies  $0 \leq c^0 \delta^0 + c^1 \delta^1 + c^2 \delta^2$ . And this contradicts (10) because  $\epsilon \delta^1 > 0$ .  $\blacksquare$

**Proof of Proposition 10.** By Proposition 3,  $s^0(s^1, s^2)$  is convex in  $(s^1, s^2)$ , hence the objective function of the assembly system problem is convex in  $(s^1, s^2)$ . Because  $(s^1, s^2)$  is monotone in  $\pi$ , we know that the objective function is quasi-convex in  $\pi$  because a convex function of a monotone function is quasi-convex.  $\blacksquare$

**Proof of Lemma 11.** The proof is based on induction on  $n$ .

Because the lead times are not zero, we need to consider the pipeline inventory. Denote  $T_n^{Ai}$  ( $T_n^{Bi}$ ) as the pipeline inventory of node  $i$  in system  $A$  (system  $B$ ) at the beginning of period  $n$ . Denote  $R_n^{Ai}$  ( $R_n^{Bi}$ ) as the shipped quantity of node  $i$  in system  $A$  (system  $B$ ) at the beginning of period  $n$ . Based on the sequence events described in §1.1, we see that the pipeline inventory and the delivery quantity of an item have the following relationship:

$$T_n^i = T_{n-1}^i + R_{n-1}^i - R_{n-l^i-1} \quad (11)$$

$$= R_{n-1}^i + \cdots + R_{n-l^i}^i \stackrel{def}{=} \mathcal{R}_{[n-l^i, n-1]}^i. \quad (12)$$

where  $l$  denotes the nominal lead time of a generic node  $i$  and  $\mathcal{R}_{[n-l^i, n-1]}^i$  is defined as the total delivery of node  $i$  between period  $n-l$  and  $n-1$  inclusive. And at the beginning of period  $n$ , due to the base-stock policy, the following equation holds in both systems:

$$I_n^i + T_n^i + Y_n^i - Y_n^j = s^i, \quad (13)$$

where  $j$  is the index of direct successor of node  $i$ .

Note that both systems face the same demand stream and both nodes 2 and 3 have identical suppliers in systems  $A$  and  $B$ . Therefore, as in §3, we can write down the delivery quantities and the shortfalls of nodes 2 and 3 in systems  $A$  and  $B$  as:

$$R_n^{Ai} = \min\{Y_n^{Ai} + \xi_n, \eta_n^i\}, \quad (14)$$

$$R_n^{Bi} = \min\{Y_n^{Bi} + \xi_n, \eta_n^i\}, \quad (15)$$

$$Y_{n+1}^{Ai} = [Y_n^{Ai} + \xi_n - \eta_n^i]^+, \quad (16)$$

$$Y_{n+1}^{Bi} = [Y_n^{Bi} + \xi_n - \eta_n^i]^+, \text{ for } i = 2, 3. \quad (17)$$

We first characterize the ordering policy of node 1 in system  $B$ . Recall that node 1 of system  $B$  has a perfect supplier. Therefore, there is no shortfall of node 1 if a *regular* base-stock policy is followed. However, we introduce a *modified* base-stock policy for the ordering activities of node 1 in system  $B$ . According to this policy, in period  $n$ , an order of node 1 is placed to raise its inventory position back to  $S^1$  subject to the constraint that its on-hand inventory level in any period is no higher than the minimum on-hand inventory level of nodes 2 and 3.

One should note the following with regard to the ordering policy of node 1:

1. This additional constraint, which *modifies* the base-stock policy, does not affect the service level of the end-product because the assembly of the end-product depends on the availability of all components.
2. This additional constraint ensures that no unnecessary inventory of component 1 is kept compared to the *regular* base-stock policy.
3. Under this policy, there might be shortfalls of node 1, however this shortfall is caused by the lower inventory level of node 2 or 3.
4. Under this policy, the assembly activity of the end-product in a period will not depend on the inventory level of nodes 2 and 3 because both are no less than the inventory level of node 1.

Clearly, to bring the inventory position of node 1 back to the base-stock level, one should order  $Y_n^{B1} + \xi_n$ . Note that  $R_n^{B1}$  will only affect the inventory level of node 1 starting from period  $n + L^1 + 1$  onwards. And the inventory level at the beginning of period  $n + L^1 + 1$  is  $T_n^{B1} + I_n^{B1} + R_n^{B1}$ , assuming no assembly activity of the end-product happens between periods  $n$  and  $n + L^1$ . And under the assumption that there is no assembly activity of the end-product between periods  $n$  and  $n + L^1$ , the inventory level of node  $i$  at the beginning of period  $n + L^1 + 1$  is  $I_n^{Bi} + \mathcal{R}_{[n-(L^1+L^i+1), n-(L^i+1)]}^{Bi}$ . Hence  $R_n^{B1}$  must satisfy  $T_n^{B1} + I_n^{B1} + R_n^{B1} \leq I_n^{Bi} + \mathcal{R}_{[n-(L^1+L^i+1), n-(L^i+1)]}^{Bi}$ . Therefore, the actual ordering quantity of node 1 in system  $B$  under the modified base-stock policy is given by

$$R_n^{B1} = \min\{Y_n^{B1} + \xi_n, I_n^{Bi} + \mathcal{R}_{[n-(L^1+L^i+1), n-(L^i+1)]}^{Bi} - I_n^{B1} - T_n^{B1}\}. \quad (18)$$

Note that the assumption that there is no assembly activity of the end-product between periods  $n$  and  $n + L^1$  is only used to facilitate the development of (18). Because the assembly of the end-product consumes the same amount of nodes 1, 2 and 3, even where there are assembly activities of the end-product during those periods, (18) still holds.

Now we are ready to prove that the end-product shortfalls are the same in both systems with induction. Assume that  $Y_k^{Ai} = Y_k^{Bi}$  for  $k \leq n$  and all  $i$ ,  $R_k^{A1} = R_k^{B1}$ ,  $R_k^{A0} = R_k^{B0}$  for  $k \leq n - 1$ . We now show that  $Y_k^{Ai} = Y_k^{Bi}$  holds for  $k = n + 1$  and all  $i$ , and  $R_k^{A1} = R_k^{B1}$ ,  $R_k^{A0} = R_k^{B0}$  holds for  $k = n$ .

From (12), we have

$$\begin{aligned} T_{n-1}^{Bi} &= \mathcal{R}_{[n-(L^1+L^i+2), n-2]}^{Bi} = R_{n-1-(L^1+L^i+1)}^{Bi} + \cdots + R_{n-L^i-2}^{Bi} + \mathcal{R}_{[n-(L^i+1), n-2]}^{Ai} \\ &= R_{n-1-(L^1+L^i+1)}^{Bi} + \cdots + R_{n-L^i-2}^{Bi} + T_{n-1}^{Ai} \end{aligned} \quad (19)$$

We now examine the relationship between  $I_n^{Ai}$  and  $I_n^{Bi}$  and the relationship between  $R_n^{A1}$  and  $R_n^{B1}$ .

Due to the base-stock policy, for  $i = 2, 3$ ,

$$I_n^{Ai} + T_n^{Ai} + Y_n^{Ai} - Y_n^{A1} = S^i \quad (20)$$

$$I_n^{Bi} + T_n^{Bi} + Y_n^{Bi} - Y_n^{B0} = S^1 + S^i \quad (21)$$

Because  $Y_n^{Ai} = Y_n^{Bi}$  and (19), we have:

$$I_n^{Bi} + \mathcal{R}_{[n-(L^1+L^i+1), n-(L^i+1)]}^{Bi} = I_n^{Ai} + S^1 + Y_n^{B0} - Y_n^{A1}. \quad (22)$$

$R_n^{A1}$  depends on the available inventories of items 2 and 3, therefore,

$$R_n^{A1} = \min_{i=2,3} \{Y_n^{A1} + \xi_n, I_n^{Ai}\}. \quad (23)$$

Hence  $R_n^{B1}$  must satisfy  $T_n^{B1} + I_n^{B1} + R_n^{B1} \leq I_n^{Bi} + \mathcal{R}_{[n-(L^1+L^i+1), n-(L^i+1)]}^{Bi}$  for  $i = 2, 3$  to satisfy the constraint of the modified base-stock policy. Therefore,

$$\begin{aligned} R_n^{B1} &= \min\{Y_n^{B1} + \xi_n, I_n^{Bi} + \mathcal{R}_{[n-(L^1+L^i+1), n-(L^i+1)]}^{Bi} - I_n^{B1} - T_n^{B1}\} \\ &\stackrel{(22)}{=} \min\{Y_n^{B1} + \xi_n, I_n^{Ai} + S^1 + Y_n^{B0} - Y_n^{A1} - I_n^{B1} - T_n^{B1}\} \\ &= \min\{Y_n^{B1} + \xi_n, I_n^{Ai} + S^1 + Y_n^{B0} - Y_n^{B1} - I_n^{B1} - T_n^{B1}\} \\ &= \min\{Y_n^{B1} + \xi_n, I_n^{Ai}\}, \end{aligned} \quad (24)$$

where the second-last equality is based on the induction assumption that  $Y_n^{A1} = Y_n^{B1}$  and the last equality is based on the fact that  $S^1 + Y_n^{B0} - Y_n^{B1} - I_n^{B1} - T_n^{B1} = 0$ .

From (14), (15), (16) and (17), for  $i = 2, 3$ , we have

$$R_n^{Ai} = R_n^{Bi}, \quad Y_{n+1}^{Ai} = Y_{n+1}^{Bi} \quad (25)$$

based on the induction assumption. Comparing (23) and (24), we see that

$$R_n^{A1} = R_n^{B1} \quad (26)$$

because  $Y_n^{A1} = Y_n^{B1}$ . Therefore, combining (26) with the induction assumption yields

$$Y_{n+1}^{A1} = Y_{n+1}^{B1}. \quad (27)$$

Because  $Y_k^{A0} = Y_k^{B0}$  for  $k \leq n$  and  $I_k^{A1} = I_k^{B1}$ ,  $R_k^{A1} = R_k^{B1}$  for  $k \leq n-1$ , at the beginning of period  $n$ , the inventory levels of node 1 are the same in both systems  $A$  and  $B$  (this is based on the fact that for both systems the delivery quantities for node 1 are the same up to period  $n$ ). Note that in system  $B$ , because the inventory level of node 1 is no higher than the inventory level of node 2 or 3 under the modified base-stock policy, the assembly of the end-product depends on the inventory level of node 1 only as in system  $A$ . Because both systems face the same demand stream,

$$R_n^{A0} = R_n^{B0}. \quad (28)$$

Hence

$$Y_{n+1}^{A0} = Y_{n+1}^{B0}. \quad (29)$$

Combining (25), (26), (27), (28), (29), we complete the induction step. ■
